# Supplementary material for: Transplantation of a bioengineered tissue patch promotes uterine repair in the sheep
Source: Royal Society of Chemistry journal article supplement (doi:10.1039/d3bm01912h), 2024-01-01
Supplement: d3bm01912h6.pdf [file d3bm01912h6.pdf]

## SUPPLEMENTARY FIGURES

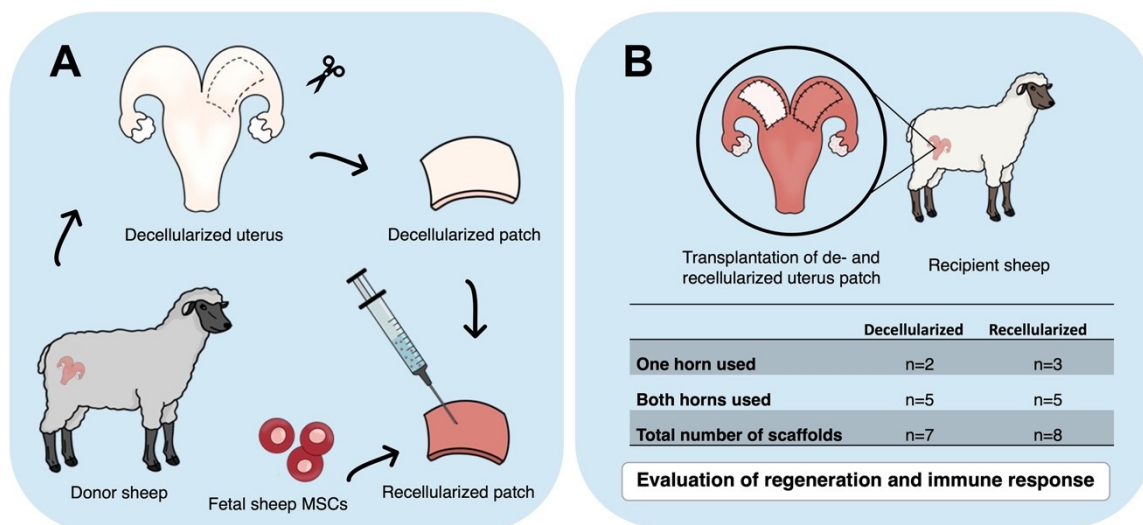

*Supplementary Figure 1. Overview of the study design. (A) Whole uteri from donor sheep were decellularized to obtain 2 x 3 cm tissue patches, which, for the recellularization group, were repopulated using fetal sheep mesenchymal stem cells. (B) A total of 10 recipient sheep got a uterus patch transplantation. Transplantations were done in two rounds. On the first one (n = 5), only one uterine horn received the graft (2 received a DC graft and 3 an RC graft). On the second one (n = 5), both uterine horns received a transplanted graft, one DC and the other one an RC graft. DC: decellularized; MSCs: mesenchymal stem cells; RC: recellularized.*

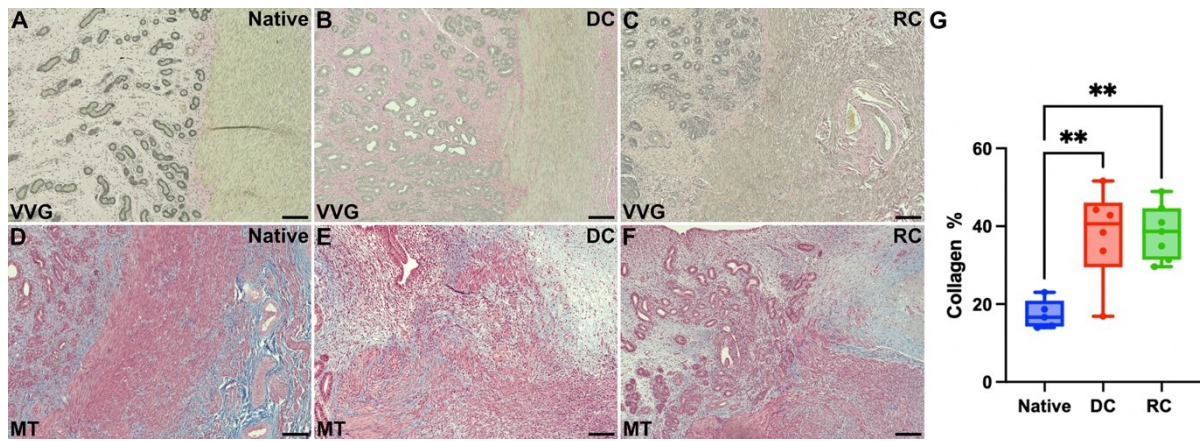

Supplementary Figure 2. Elastin staining was detected in native (A) but also both experimental groups (B,C). Collagen was also visualized (D,E,F) and quantified (G) in native and both experimental groups. DC: decellularized; MT: Masson's trichrome staining; RC: recellularized; VVG: Verhof-van Gieson staining. Scale bars = 125  $\mu$ m, \*\* $p$  < 0.01

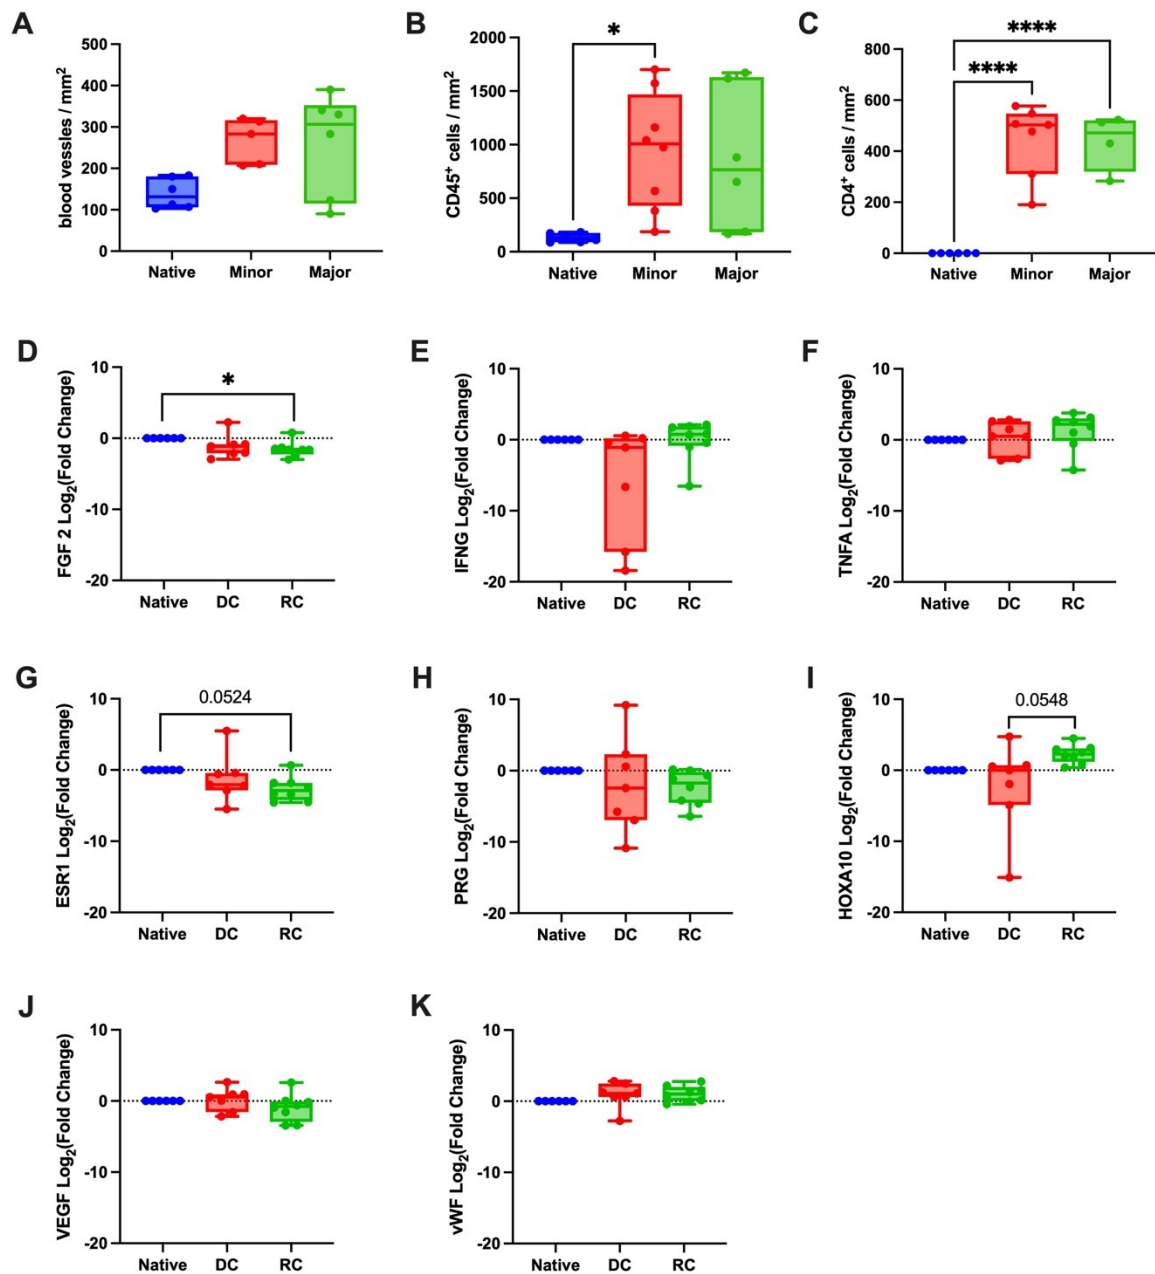

Supplementary Figure 3. The number of blood vessels quantified was significantly higher in the recellularized group (A). Infiltration of CD45<sup>+</sup>(B) and CD4<sup>+</sup> (C) showed a significant increase compared to the native control. Fold changes of both experimental groups (DC and RC) are calculated in relation to the native control group. Target genes were fibroblast growth factor 2 (FGF2; D), interferon-gamma (IFNG; E), tumor necrosis alpha (TNFA; F), estrogen receptor 1 (ESR1; G), progesterone receptor (PGR; H), homeobox A10 (HOXA10; I), vascular endothelial growth factor (VEGF; J), and von Willebrand factor (vWF; K). CD45<sup>+</sup>; Leukocytes, CD4; T-cells, DC: decellularized; ns: non-significant; RC: recellularized. \*\* $p < 0.05$  \*\* $p < 0.01$ , \*\*\*\* $p < 0.0001$ .

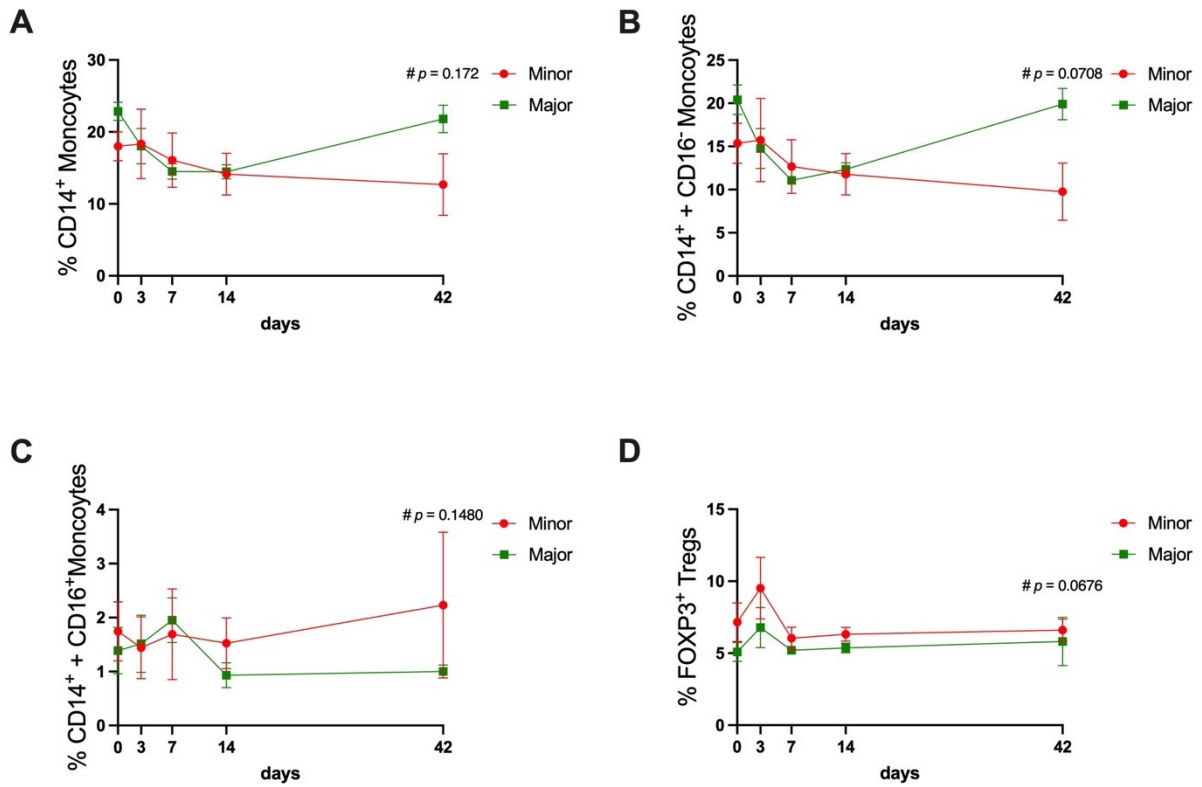

Supplementary Figure 4. The systemic immune response FACS analysis revealed no changes between groups (minor and major regeneration groups) or across time in the percentage of monocytes (A), either if considering their classical (CD14<sup>+</sup>CD16<sup>-</sup>; B) or non-classical (CD14<sup>+</sup>CD16<sup>+</sup>; C) phenotypes. The percentage of regulatory T cells also remained the same between groups (D).

Supplementary Table 1. Primers and probes design. NCBI accession for each of the genes and nucleotide sequences for forward (FW) and reverse (RV) primers and probes are shown in the table. Intercalating dyes and quenchers included in the probes are also

| Gene          | NCBI accession | Primers sequences 5'→3'                                                                     | 5'→3' dye and quenchers in probes |
|---------------|----------------|---------------------------------------------------------------------------------------------|-----------------------------------|
| <i>PGR</i>    | XM_015100878.3 | FW: TCTGCTGACAAGTCTGAA<br>RV (as): GGTCATCAATATGTAAGTTCCG<br>P: CTCAGTGGTCAAGTGGTCTAAGTCA   | 6-FAM/ZEN/IBFQ                    |
| <i>ESR1</i>   | XM_027972563.2 | FW: GCACTTTACCCACATCATG<br>RV (as): GGCTGTTCCCAAACAAG<br>P: TCGCTCGGTTCTATGTGGCA            | HEX/ZEN/IBFQ                      |
| <i>HOXA10</i> | XM_004007939   | FW: AGCTCTATTTACTTCTAATCTTAA<br>RV (as): CACAGCTTTTATTCTTCTATAAG<br>P: GTAATGCTGCTGTGCGTGAA | HEX/ZEN/IBFQ                      |
| <i>VEGF</i>   | NM_001025110   | FW: CTGCTGTAATGACGAAAG<br>RV (as): TGCTGTAGGAAACTCATC<br>P: CCACTGAGGAGTTCAACATCACCA        | 6-FAM/ZEN/IBFQ                    |
| <i>vWF</i>    | XM_027967983   | FW: CATCGTGACCTTTGATGG<br>RV (as): GCAGAATCCGTTATGGAG<br>P: GGAGCAGGACTTGAGGTGAT            | HEX/ZEN/IBFQ                      |
| <i>IFNG</i>   | NM_001009803   | FW: GCCATCAATGAACTCATC<br>RV (as): CAGGAGAACCATTACATTG<br>P: TGATGAATGACCTGTGCGCAA          | 6-FAM/ZEN/IBFQ                    |
| <i>FGF2</i>   | NM_001009769.1 | FW: GAACGATTGGAGTCTAATAAC<br>RV (as): TGGGTCCAAGTTTATACTG<br>ACTCCAGTTGGTATGTGGCACT         | 6-FAM/ZEN/IBFQ                    |
| <i>TNFA</i>   | NM_001024860.1 | FW: GATGCTGATTTGGTGACTG<br>RV (as): CTCAGGACACTTTATTTCTCG<br>P: TACATCACTGAACCTCCGCTCC      | 6-FAM/ZEN/IBFQ                    |
| <i>PPIH</i>   | XM_027968560   | FW: GATGGACTTCTGGTGATG<br>RV (as): CCTCTGGACTACATCTCC<br>P: AAGCTGCCTGTGGTGTCTCA            | HEX/ZEN/IBFQ                      |

Supplementary Table 2. Monoclonal antibodies used for the flow cytometry analysis. AF: alexa fluor; BV: brilliant violet; CD: cluster of differentiation; Cy: cyanine; FITC: fluorescein isothiocyanate; Ig: immunoglobulin; MHC: major histocompatibility complex; NCR1: natural cytotoxicity triggering receptor 1; NK: natural killer; PE: phycoerythrin; PerCP: peridinin chlorophyll protein.

| <b>Characterization of monocytes, macrophages, and NK cells</b>                    |                     |              |                           |
|------------------------------------------------------------------------------------|---------------------|--------------|---------------------------|
| <b>Monoclonal antibody target protein</b>                                          | <b>Fluorochrome</b> | <b>Clone</b> | <b>Catalogue No.</b>      |
| CD14                                                                               | AF488               | Tuk4         | BioRad (MCA1568A488)      |
| CD68                                                                               | AF647               | SK3          | BioRad (MCA341A647)       |
| CD16 (primary antibody)                                                            | -                   | VPM64        | BioRad (MCA919GA)         |
| NKp46 (CD335/NCR1)                                                                 | PE                  | AKS1         | BioRad (MCA2365PE)        |
| IgG1(secondary antibody)                                                           | BV421               | A85-1 (RUO)  | BD Biosciences (562580)   |
| <b>Characterization of T<sub>Regs</sub>, cytotoxic T cells, and helper T cells</b> |                     |              |                           |
| <b>Monoclonal antibody target protein</b>                                          | <b>Fluorochrome</b> | <b>Clone</b> | <b>Catalogue No.</b>      |
| FOXP3                                                                              | PerCP-Cy5.5         | FJK-16s      | eBioscience™ (45-5773-82) |
| CD25                                                                               | FITC                | 9.14         | BioRad (MCA2218F)         |
| MHC2                                                                               | PE                  | 28.1         | BioRad (MCA2225PE)        |
| MHC2                                                                               | FITC                | 28.1         | BioRad (MCA2228F)         |
| CD4                                                                                | AF647               | 44.38        | BioRad (MCA2213A647)      |
| CD45R (primary antibody)                                                           | -                   | 20.96        | BioRad (MCA2221GA)        |
| CD8                                                                                | PE                  | 38.65        | BioRad (MCA2216PE)        |
| IgG1(secondary antibody)                                                           | BV421               | A85-1 (RUO)  | BD Biosciences (562580)   |
