# Supplementary figures and images for: Transplantation of a bioengineered tissue patch promotes uterine repair in the sheep
Source: Royal Society of Chemistry journal article supplement (doi:10.1039/d3bm01912h), 2024-01-01

**A**

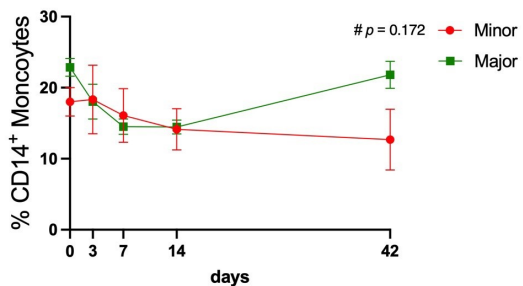

**B**

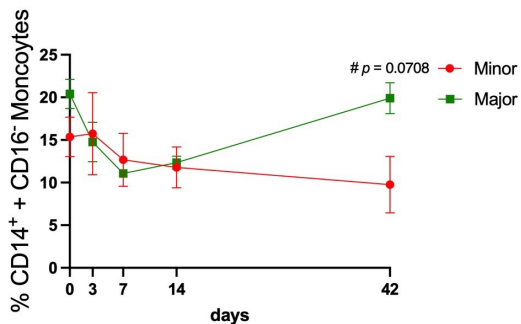

**C**

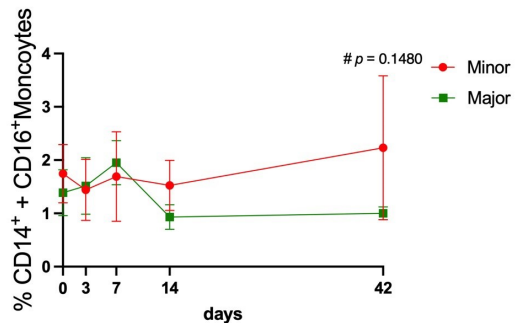

**D**

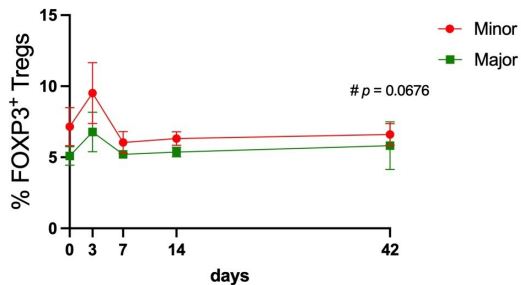

Supplement: d3bm01912h2.pdf [file d3bm01912h2.pdf]

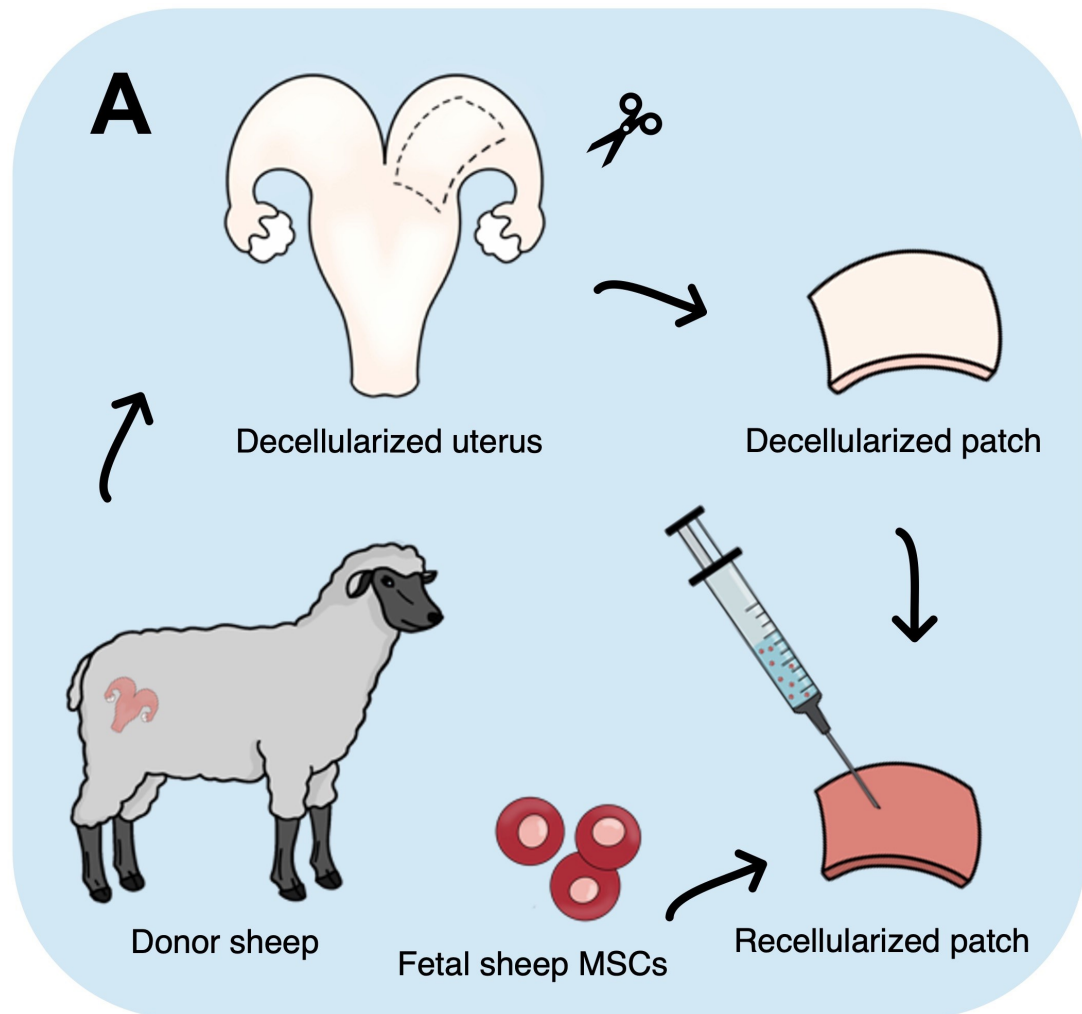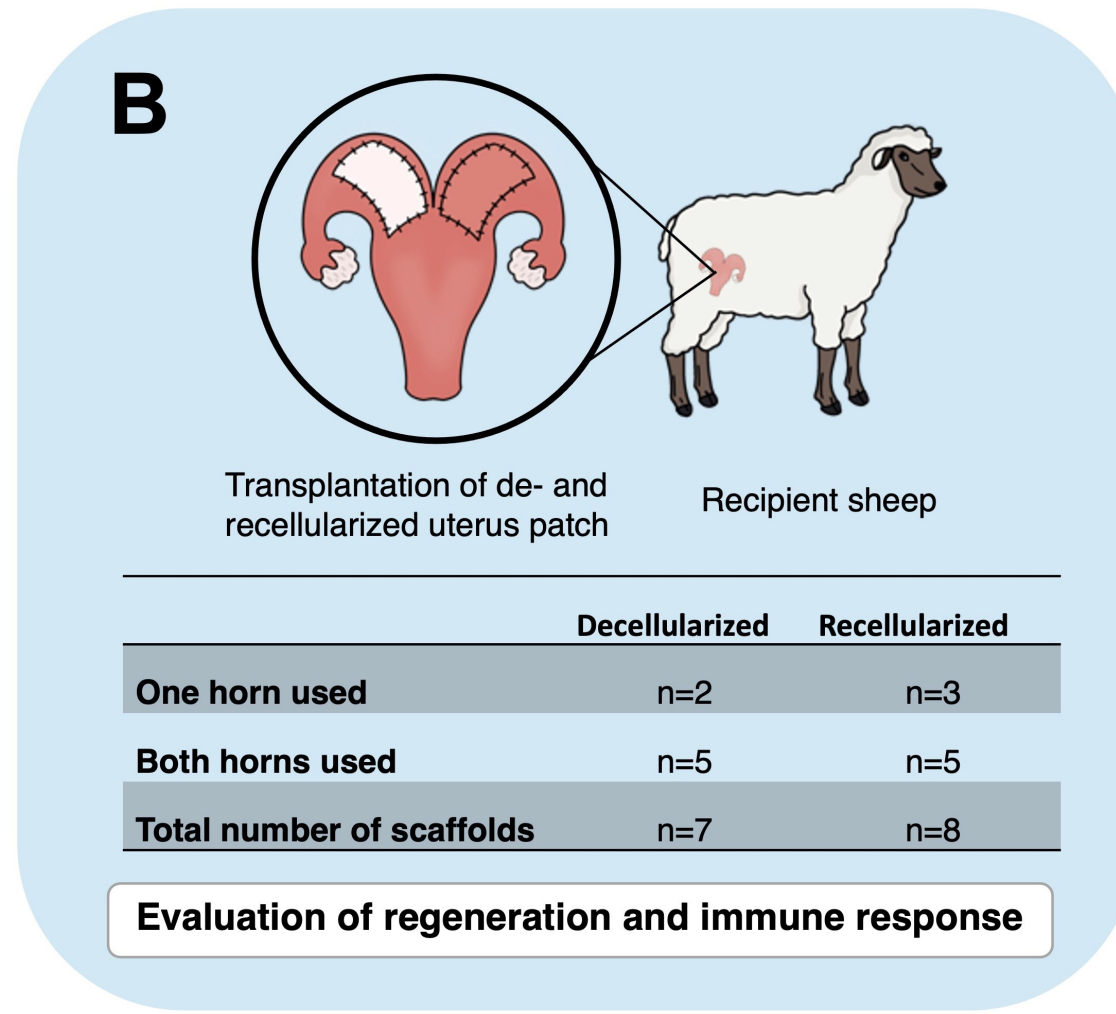

Supplement: d3bm01912h3.pdf [file d3bm01912h3.pdf]

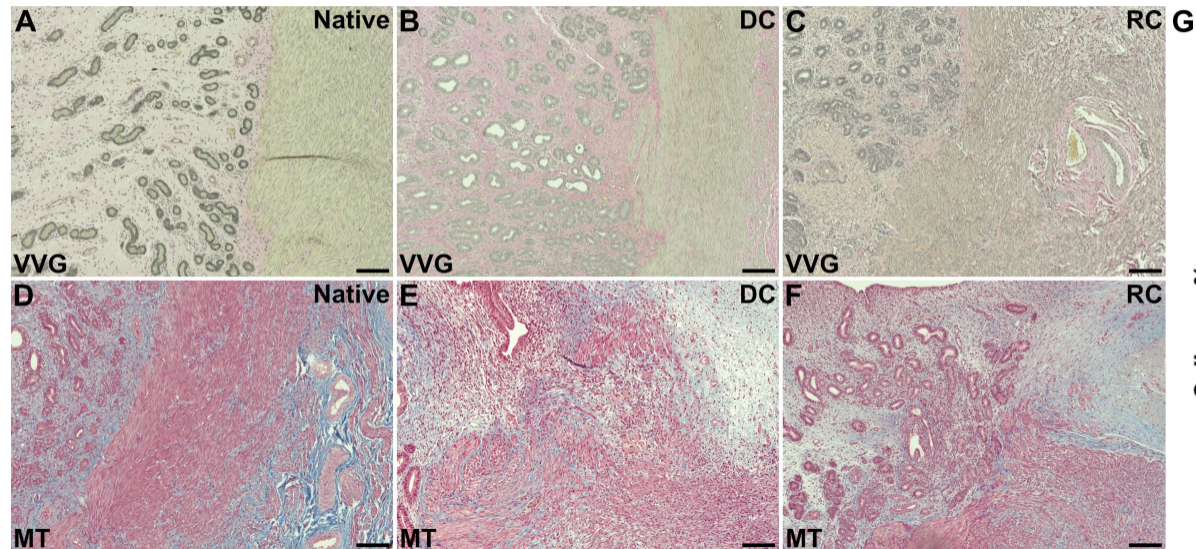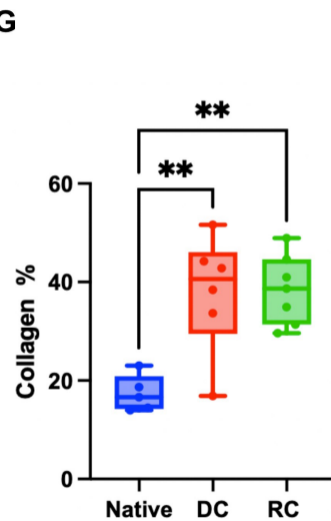

Supplement: d3bm01912h4.pdf [file d3bm01912h4.pdf]

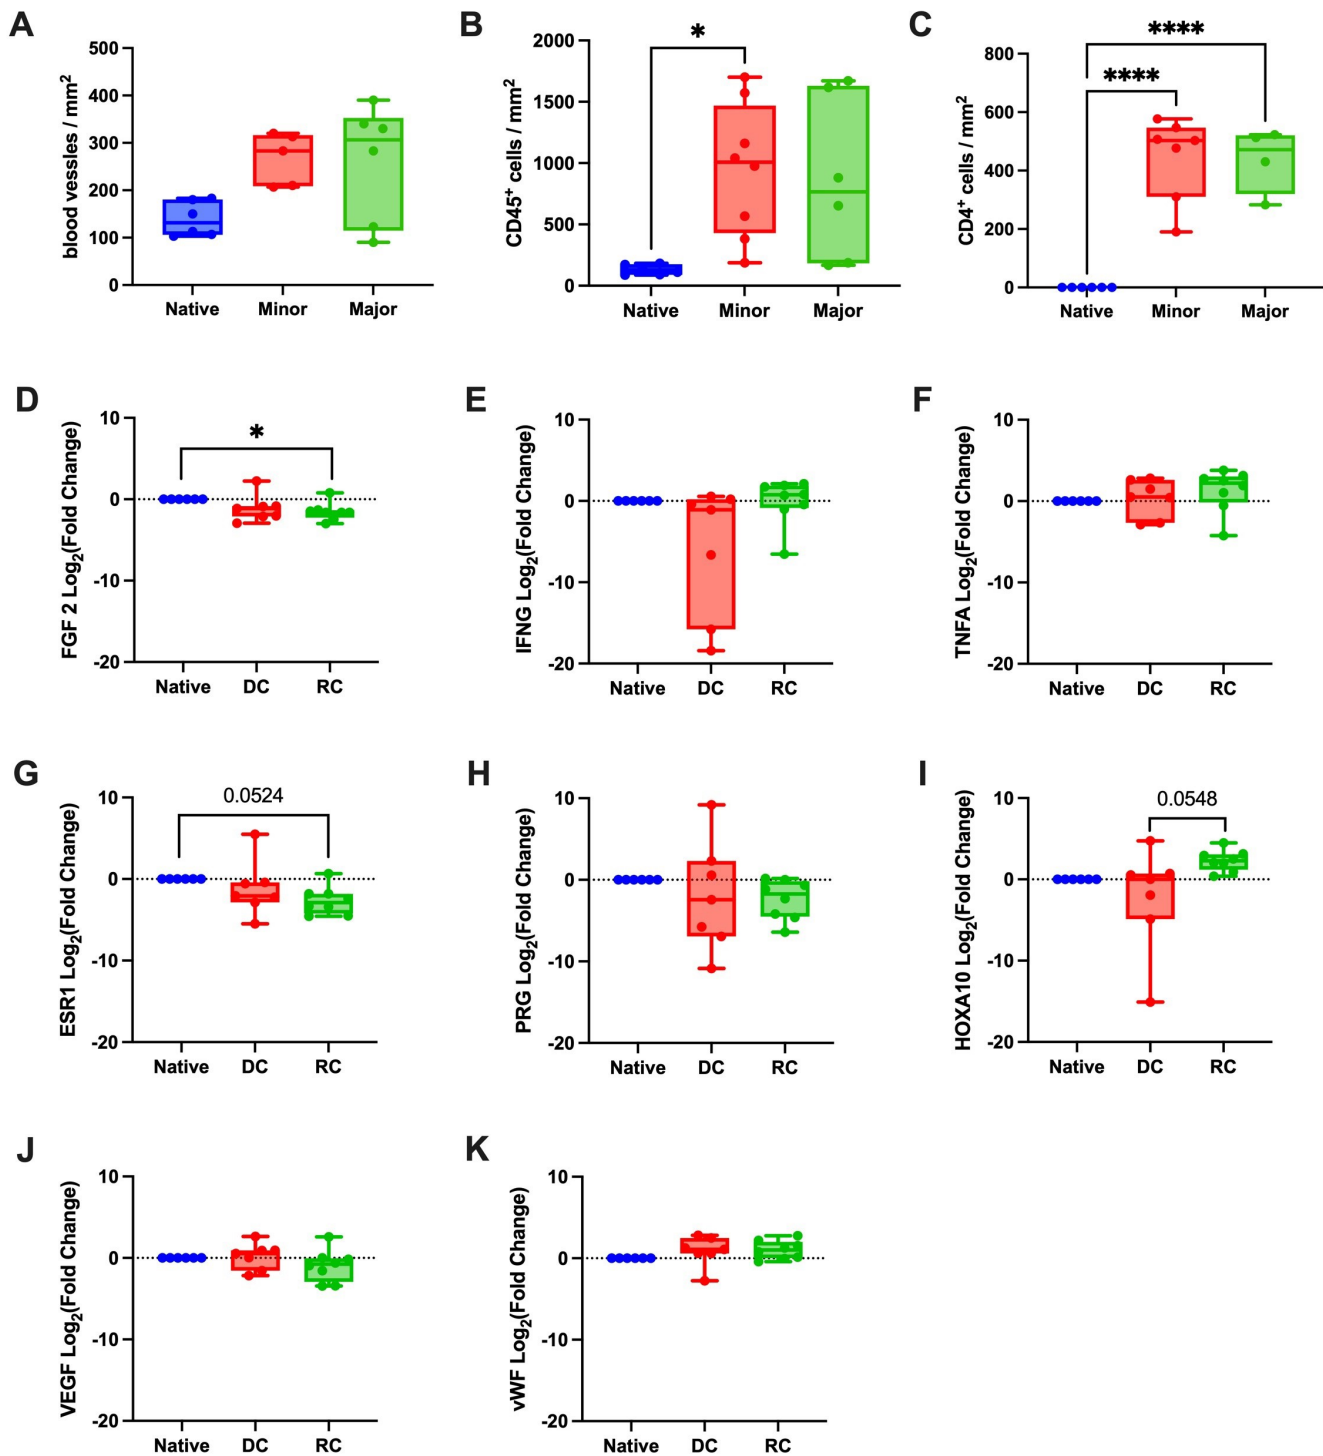

Supplement: d3bm01912h5.pdf [file d3bm01912h5.pdf]
